# Supplementary figures and images for: Ethyl Vanillin Rapid Crystallization from Carboxymethyl Chitosan Ion-Switchable Hydrogels
Source: MDPI journal article supplement (doi:10.3390/gels9040335), 2023-04-14

Supplement:

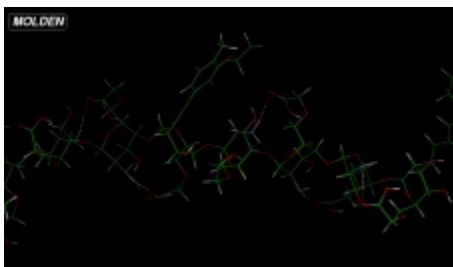

S1 Hydrogen bond network formed between EVA and CMCS by molecular simulation.

Supplement: s1 [file s1]
